# Supplementary material for: Assessing the burden of bronchiolitis and lower respiratory tract infections in children ≤24 months of age in Italy, 2012–2019
Source: Frontiers journal article supplement (doi:10.3389/fped.2023.1143735), 2023-05-05

## Supplementary material

### Episode definition:

Bronchiolitis episode is defined as first visit with a bronchiolitis diagnosis identified with

- an International Classification of Diseases, 9th Revision, Clinical Modification code (ICD-9-CM):

- acute bronchiolitis (ICD-9-CM code 466.1, 466.11 or 466.19)

OR

- a descriptive diagnosis, retrieved searching free text fields:

- description of first episode of respiratory distress with at least two of the following symptoms coryza, cough, wheezing or crackles, and tachypnea or chest retractions, skin color changes, nasal flaring or fever [8,9]

RSV-bronchiolitis is defined as first visit with a bronchiolitis diagnosis identified with

- an International Classification of Diseases, 9th Revision, Clinical Modification code (ICD-9-CM):

- acute bronchiolitis (ICD-9-CM code 466.1, 466.11 or 466.19)

AND

- RSV infection (ICD-9-CM code: 079.6, Respiratory syncytial virus (RSV))

OR

- a descriptive diagnosis, retrieved searching free text fields:

- description of first episode of respiratory distress with at least two of the following symptoms coryza, cough, wheezing or crackles, and tachypnea or chest retractions, skin color changes, nasal flaring or fever [8,9]

AND

- RSV infection (ICD-9-CM code: 079.6, Respiratory syncytial virus (RSV))

Non-specific bronchiolitis is defined as a first visit with a bronchiolitis diagnosis identified with

- an International Classification of Diseases, 9th Revision, Clinical Modification code (ICD-9-CM):

- acute bronchiolitis (ICD-9-CM code 466.1, 466.11 or 466.19)

OR

- a descriptive diagnosis, retrieved searching free text fields:

- description of first episode of respiratory distress with at least two of the following symptoms coryza, cough, wheezing or crackles, and tachypnea or chest retractions, skin color changes, nasal flaring or fever [8,9]

WITHOUT a mention of

- RSV infection (ICD-9-CM code: 079.6, Respiratory syncytial virus (RSV))

Pneumonia diagnosis is defined as first visit with pneumonia identified with

- an International Classification of Diseases, 9th Revision, Clinical Modification code (ICD-9-CM):
  - pneumonia (ICD-9-CM code 485, 486)

OR

- a descriptive diagnosis, retrieved searching free text fields:
  - description of lower respiratory tract infection with the presence of i) fever at the moment of visit (core body temperature > 38°C), ii)  
AND
  - at least one symptom (cough, sputum production, pleuritic pain, poor feeding), iii)  
AND
  - at least one sign (tachypnea, dyspnea, wheezing, inspiratory crackles, bronchial breathing, pleural rub) for less than 14 days, iv)  
AND/OR
  - new or increasing alveolar infiltrate in chest radiography (if available).

RSV-Pneumonia diagnosis is defined as first visit with pneumonia identified with

- an International Classification of Diseases, 9th Revision, Clinical Modification code (ICD-9-CM):
  - Pneumonia due to RSV (ICD-9-CM code 480.1)

OR

- pneumonia (ICD-9-CM code 485, 486)  
AND
- RSV infection (ICD-9-CM code: 079.6)

OR

- a descriptive diagnosis, retrieved searching free text fields:
  - description of lower respiratory tract infection with the presence of i) fever at the moment of visit (core body temperature > 38°C), ii)  
AND
  - at least one symptom (cough, sputum production, pleuritic pain, poor feeding), iii)  
AND
  - at least one sign (tachypnea, dyspnea, wheezing, inspiratory crackles, bronchial breathing, pleural rub) for less than 14 days, iv)  
AND/OR
  - new or increasing alveolar infiltrate in chest radiography (if available)  
AND
  - RSV infection (ICD-9-CM code: 079.6)

Bronchitis diagnosis is defined as first visit with bronchitis identified with

- an International Classification of Diseases, 9th Revision, Clinical Modification code (ICD-9-CM):
  - acute bronchitis (ICD-9-CM code 466.0)

RSV-Bronchitis diagnosis is defined as first visit with bronchitis identified with

- an International Classification of Diseases, 9th Revision, Clinical Modification code (ICD-9-CM):
  - acute bronchitis (ICD-9-CM code 466.0)
  - AND
  - RSV infection (ICD-9-CM code: 079.6, Respiratory syncytial virus (RSV))

**Table 1s. Comorbidities and risk factors considered. Peditnet 2012-2019**

| <b>Risk Factors - Diagnostic Group</b>                        | <b>Code</b>                |
|---------------------------------------------------------------|----------------------------|
| <i>Pulmonary</i>                                              |                            |
| Cystic fibrosis                                               | 277.0                      |
| Bronchopulmonary dysplasia                                    | 770.7                      |
| Bronchiectasis                                                | 494                        |
| Chronic bronchitis                                            | 491                        |
| Chronic respiratory disease or failure                        | 518.83, 518.84, 519.9      |
| Congenital anomalies of respiratory system                    | 748                        |
| <i>Nervous - Neuromuscular</i>                                |                            |
| Cerebral degenerations usually manifest in childhood          | 330                        |
| Anterior horn cell disease                                    | 335                        |
| Infantile cerebral palsy                                      | 343                        |
| Hereditary and idiopathic peripheral neuropathy               | 356                        |
| Myoneural disorders                                           | 358                        |
| Muscular dystrophies and other myopathies                     | 359.0-359.23, 359.9, 775.2 |
| Spina bifida and other congenital anomalies of nervous system | 740 – 742, 308.2           |
| Psychomotor retardation                                       |                            |
| <i>Cardiovascular</i>                                         |                            |
| Congenital heart disease                                      | 745.0 – 747.4, 747.83      |
| Heart failure                                                 | 428                        |
| Chronic pulmonary heart disease                               | 416                        |
| Cardiomyopathy                                                | 425.1-425.4, 429.1, 429.3  |
| <i>Immunosuppressive disorders or therapies</i>               |                            |
| HIV infection                                                 | 042 (V08)                  |
| Malignancy                                                    | 140-208                    |
| Hereditary immunodeficiency                                   | 279                        |
| Organ or bone marrow transplantation                          | V42                        |
| Radiation or chemotherapy person-years                        | V58.0-V58.1                |
| Asplenia                                                      | 759.0                      |
| Diseases of white blood cells                                 | 288                        |
| <i>Others</i>                                                 |                            |
| Down's syndrome                                               | 758.0                      |
| Other chromosomal anomalies                                   | 758.1-758.9                |
| Congenital infections                                         | 090, 771.0-771.2           |
| Congenital deformities of the spine                           | 754.2, 756.1               |
| Metabolic disorders                                           | 270 – 272, 277             |

**Table 2s. Incidence rates of bronchiolitis and RSV-bronchiolitis in children aged 0-2 years overall and stratified by sex, age class, season and in-season vs. out-season. Pedianet 2012-2019**

|                                              | No. of<br>bronchiolitis<br>episodes<br>(N=7,956) | Bronchiolitis Incidence<br>Rate x 1,000 person-years<br>(95% IC) | No. of RSV-<br>bronchiolitis<br>episodes<br>(N=388) | RSV-bronchiolitis<br>Incidence Rate x<br>1,000 person-years<br>(95% IC) |
|----------------------------------------------|--------------------------------------------------|------------------------------------------------------------------|-----------------------------------------------------|-------------------------------------------------------------------------|
| <b>Total</b>                                 | 7,956                                            | 46.57 (45.55 - 47.6)                                             | 388                                                 | 2.27 (2.05 - 2.5)                                                       |
| <b>Sex</b>                                   |                                                  |                                                                  |                                                     |                                                                         |
| Male                                         | 4,611                                            | 55.74 (54.13 - 57.34)                                            | 208                                                 | 2.51 (2.17 - 2.86)                                                      |
| Female                                       | 3,345                                            | 37.97 (36.68 - 39.26)                                            | 180                                                 | 2.04 (1.74 - 2.34)                                                      |
| <b>Age class</b>                             |                                                  |                                                                  |                                                     |                                                                         |
| <30 days                                     | 260                                              | 58.89 (51.74 - 66.05)                                            | 39                                                  | 8.83 (6.06 - 11.61)                                                     |
| 31-60 days                                   | 765                                              | 117.41 (109.09 - 125.73)                                         | 83                                                  | 12.74 (10.00 - 15.48)                                                   |
| 61-90 days                                   | 835                                              | 122.03 (113.75 - 130.31)                                         | 73                                                  | 10.67 (8.22 - 13.12)                                                    |
| 4 months                                     | 835                                              | 120.23 (112.07 - 128.38)                                         | 59                                                  | 8.5 (6.33 - 10.66)                                                      |
| 5 months                                     | 857                                              | 122.21 (114.03 - 130.39)                                         | 24                                                  | 3.42 (2.05 - 4.79)                                                      |
| 6 months                                     | 846                                              | 119.8 (111.73 - 127.87)                                          | 27                                                  | 3.82 (2.38 - 5.27)                                                      |
| 7 months                                     | 684                                              | 96.4 (89.18 - 103.63)                                            | 19                                                  | 2.68 (1.47 - 3.88)                                                      |
| 8 months                                     | 578                                              | 81.08 (74.47 - 87.69)                                            | 14                                                  | 1.96 (0.94 - 2.99)                                                      |
| 9 months                                     | 427                                              | 59.62 (53.97 - 65.28)                                            | 10                                                  | 1.4 (0.53 - 2.26)                                                       |
| 10 months                                    | 338                                              | 47 (41.99 - 52.01)                                               | 6                                                   | 0.83 (0.17 - 1.5)                                                       |
| 11 months                                    | 280                                              | 38.76 (34.22 - 43.3)                                             | 10                                                  | 1.38 (0.53 - 2.24)                                                      |
| 12 months                                    | 257                                              | 30.41 (26.69 - 34.12)                                            | 5                                                   | 0.59 (0.07 - 1.11)                                                      |
| 13-24 months                                 | 994                                              | 11.32 (10.62 - 12.03)                                            | 19                                                  | 0.22 (0.12 - 0.31)                                                      |
| <b>Season</b>                                |                                                  |                                                                  |                                                     |                                                                         |
| Autumn [1Oct-31Dec]                          | 2,172                                            | 51.36 (49.2 - 53.52)                                             | 91                                                  | 2.15 (1.71 - 2.59)                                                      |
| Winter [1Jan-31Mar]                          | 4,338                                            | 101.4 (98.38 - 104.42)                                           | 254                                                 | 5.94 (5.21 - 6.67)                                                      |
| Spring [1Apr-30Jun]                          | 1,137                                            | 26.44 (24.91 - 27.98)                                            | 39                                                  | 0.91 (0.62 - 1.19)                                                      |
| Summer [1Jul-30Sep]                          | 309                                              | 7.23 (6.42 - 8.03)                                               | 4                                                   | 0.09 (0 - 0.19)                                                         |
| <b>In season vs out of season</b>            |                                                  |                                                                  |                                                     |                                                                         |
| In season [October 1st -<br>31 Mar]          | 6,510                                            | 76.54 (74.69 - 78.4)                                             | 345                                                 | 4.06 (3.63 - 4.48)                                                      |
| Out of season [April 1st-<br>September 30th] | 1,446                                            | 16.86 (15.99 - 17.73)                                            | 43                                                  | 0.5 (0.35 - 0.65)                                                       |

Figure 2s. Bronchiolitis IR by calendar month in children aged 0-2 years. Pedianet 2012-2019

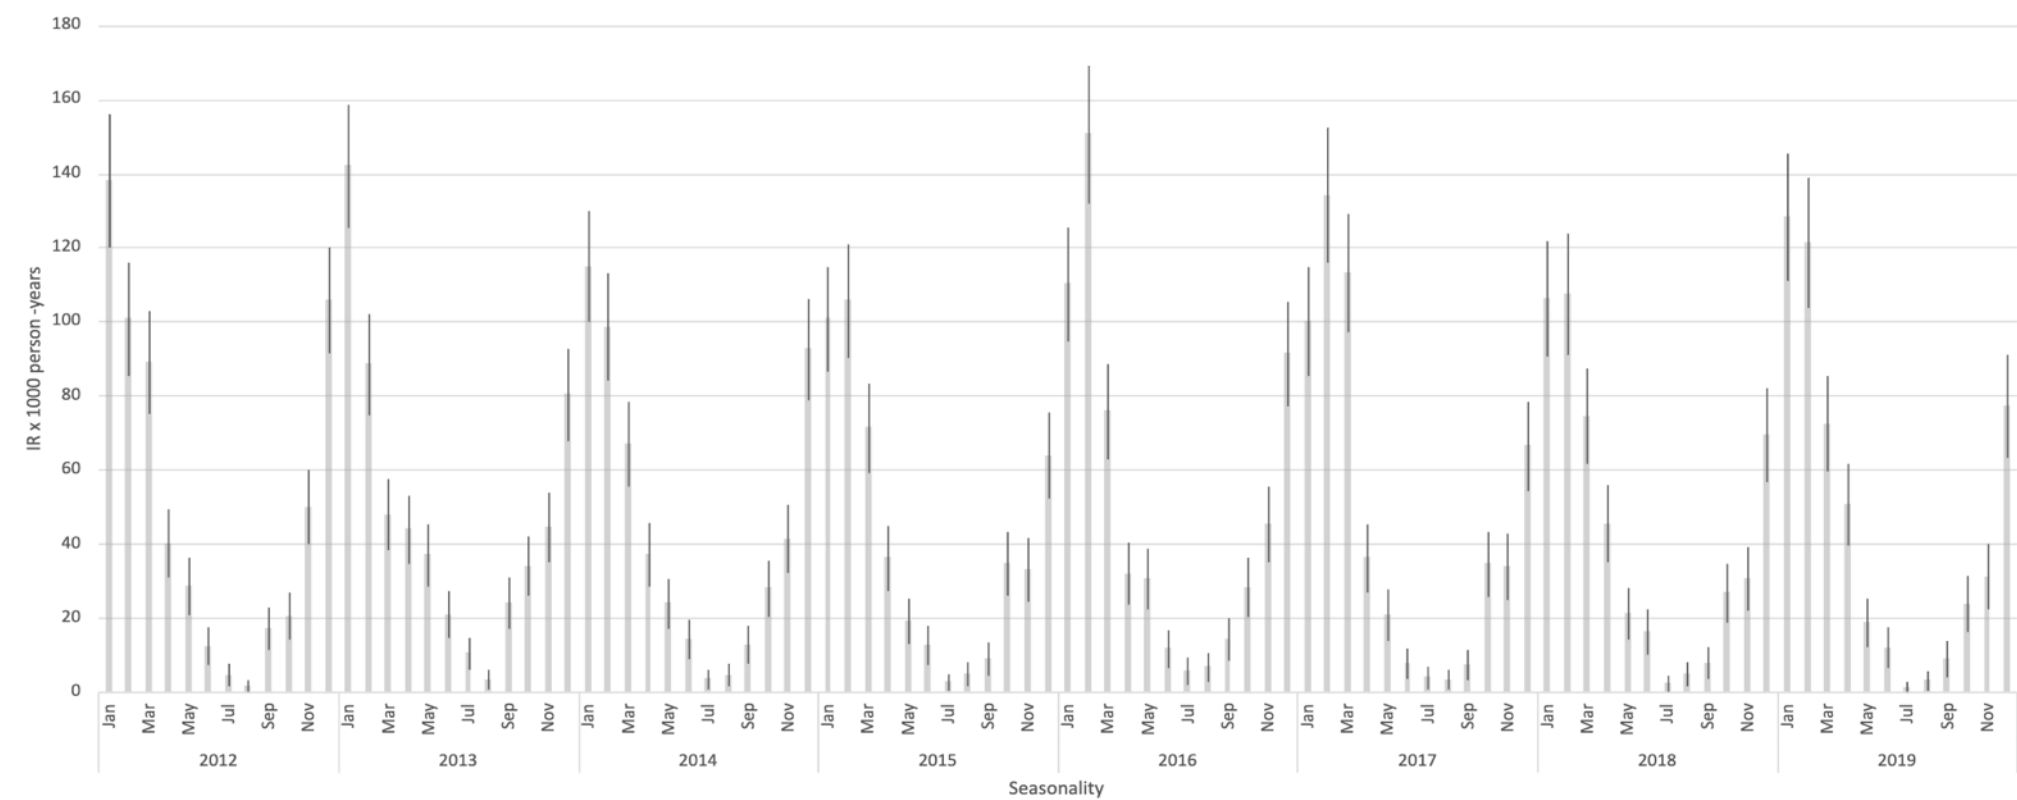

**Figure 3s. Bronchiolitis IR in children aged < 1 year, overall and stratified by season, in-season vs. out-season, calendar month of the episode and birth month of the child. Pedianet 2012-2019**

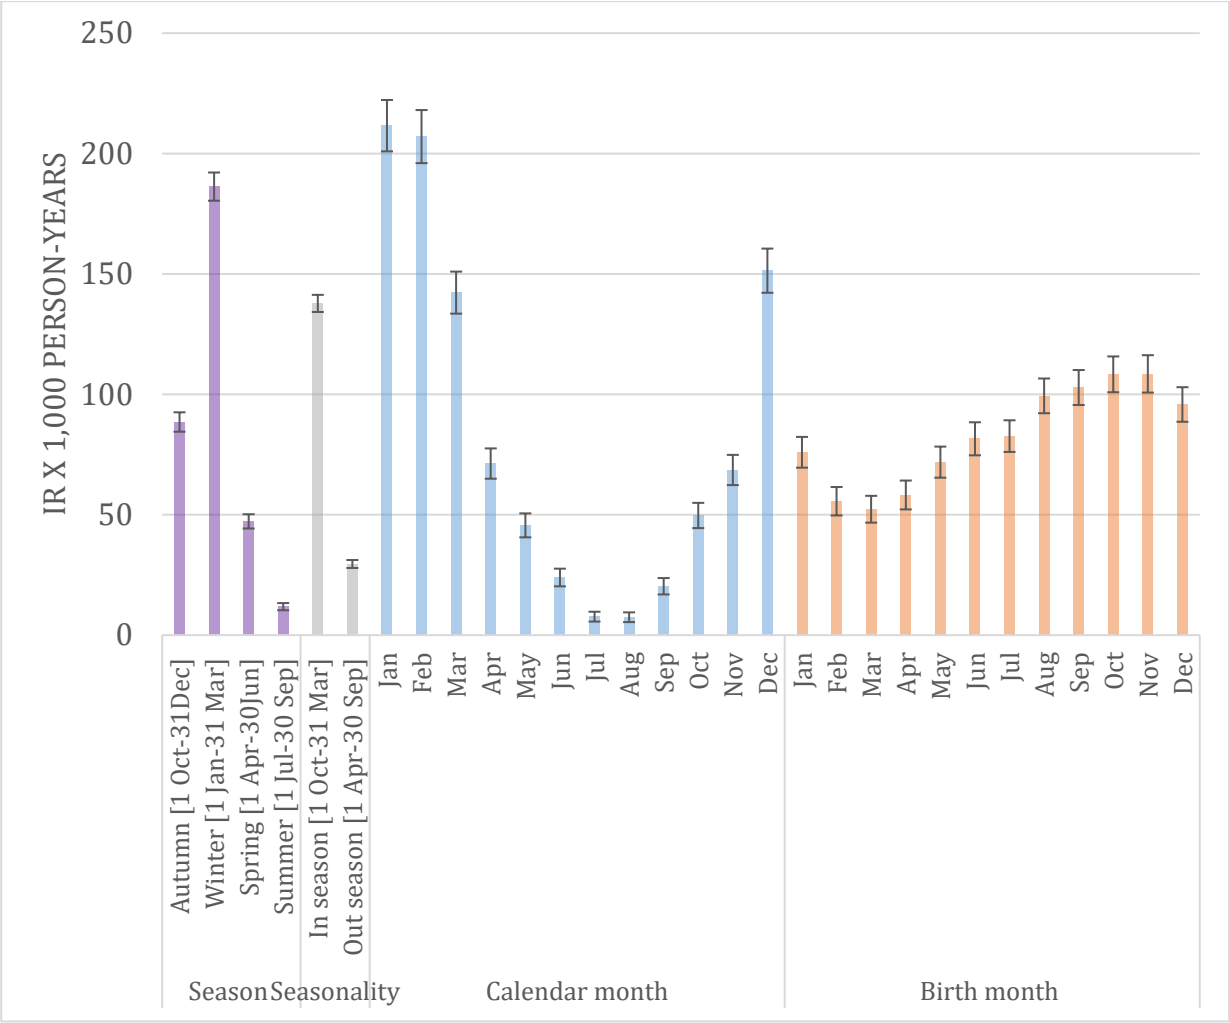

**Table 3s. Incidence rates of LRTI and RSV-LRTI in children aged 0-2 years overall and stratified by sex, age class, season and in-season vs. out-season. PediaNet 2012-2019**

|                                  | <b>No. of LRTI episodes<br/>(N=37,827)</b> | <b>LRTI incidence rate x<br/>1,000 person-years (95%<br/>IC)</b> | <b>No. of RSV-<br/>LRTI episodes<br/>(N=394)</b> | <b>RSV-LRTI incidence<br/>rate x 1,000 person-<br/>years (95% IC)</b> |
|----------------------------------|--------------------------------------------|------------------------------------------------------------------|--------------------------------------------------|-----------------------------------------------------------------------|
| <b>Total</b>                     | 37,827                                     | 221.44 (219.21 - 223.67)                                         | 394                                              | 2.31 (2.08 - 2.53)                                                    |
| <b>Sex</b>                       |                                            |                                                                  |                                                  |                                                                       |
| <i>Male</i>                      | 21,558                                     | 260.59 (257.11 - 264.06)                                         | 213                                              | 2.57 (2.23 - 2.92)                                                    |
| <i>Female</i>                    | 16,269                                     | 184.67 (181.84 - 187.51)                                         | 181                                              | 2.05 (1.76 - 2.35)                                                    |
| <b>Age class</b>                 |                                            |                                                                  |                                                  |                                                                       |
| <i>&lt;30 days</i>               | 366                                        | 82.91 (74.41 - 91.4)                                             | 39                                               | 8.83 (6.06 - 11.61)                                                   |
| <i>31-60 days</i>                | 1,050                                      | 161.15 (151.4 - 170.89)                                          | 85                                               | 13.05 (10.27 - 15.82)                                                 |
| <i>61-90 days</i>                | 1,281                                      | 187.21 (176.96 - 197.46)                                         | 75                                               | 10.96 (8.48 - 13.44)                                                  |
| <i>4 months</i>                  | 1,459                                      | 210.07 (199.29 - 220.85)                                         | 59                                               | 8.5 (6.33 - 10.66)                                                    |
| <i>5 months</i>                  | 1,733                                      | 247.13 (235.5 - 258.77)                                          | 24                                               | 3.42 (2.05 - 4.79)                                                    |
| <i>6 months</i>                  | 1,928                                      | 273.02 (260.83 - 285.21)                                         | 27                                               | 3.82 (2.38 - 5.27)                                                    |
| <i>7 months</i>                  | 1,916                                      | 270.05 (257.95 - 282.14)                                         | 19                                               | 2.68 (1.47 - 3.88)                                                    |
| <i>8 months</i>                  | 1,872                                      | 262.61 (250.71 - 274.51)                                         | 14                                               | 1.96 (0.94 - 2.99)                                                    |
| <i>9 months</i>                  | 1,762                                      | 246.03 (234.55 - 257.52)                                         | 10                                               | 1.4 (0.53 - 2.26)                                                     |
| <i>10 months</i>                 | 1,701                                      | 236.52 (225.28 - 247.76)                                         | 6                                                | 0.83 (0.17 - 1.5)                                                     |
| <i>11 months</i>                 | 1,637                                      | 226.6 (215.62 - 237.58)                                          | 10                                               | 1.38 (0.53 - 2.24)                                                    |
| <i>12 months</i>                 | 1,782                                      | 210.83 (201.04 - 220.62)                                         | 5                                                | 0.59 (0.07 - 1.11)                                                    |
| <i>13-24 months</i>              | 19,340                                     | 220.33 (217.22 - 223.43)                                         | 21                                               | 0.24 (0.14 - 0.34)                                                    |
| <b>Season</b>                    |                                            |                                                                  |                                                  |                                                                       |
| <i>Autumn [1Oct-31Dec]</i>       | 11,001                                     | 260.12 (255.26 - 264.98)                                         | 93                                               | 2.2 (1.75 - 2.65)                                                     |
| <i>Winter [1Jan-31Mar]</i>       | 16,594                                     | 387.87 (381.97 - 393.78)                                         | 257                                              | 6.01 (5.27 - 6.74)                                                    |
| <i>Spring [1Apr-30Jun]</i>       | 7,369                                      | 171.38 (167.47 - 175.3)                                          | 40                                               | 0.93 (0.64 - 1.22)                                                    |
| <i>Summer [1Jul-30Sep]</i>       | 2,863                                      | 66.96 (64.51 - 69.41)                                            | 4                                                | 0.09 (0 - 0.19)                                                       |
| <b>In season vs out season</b>   |                                            |                                                                  |                                                  |                                                                       |
| <i>In season [1 Oct-31 Mar]</i>  | 27,595                                     | 324.46 (320.64 - 328.29)                                         | 350                                              | 4.12 (3.68 - 4.55)                                                    |
| <i>Out season [1 Apr-30 Sep]</i> | 10,232                                     | 119.28 (116.97 - 121.59)                                         | 44                                               | 0.51 (0.36 - 0.66)                                                    |

**Figure 4s. LRTI IR by calendar month in children aged 0-2 years. Pedianet 2012-2019**

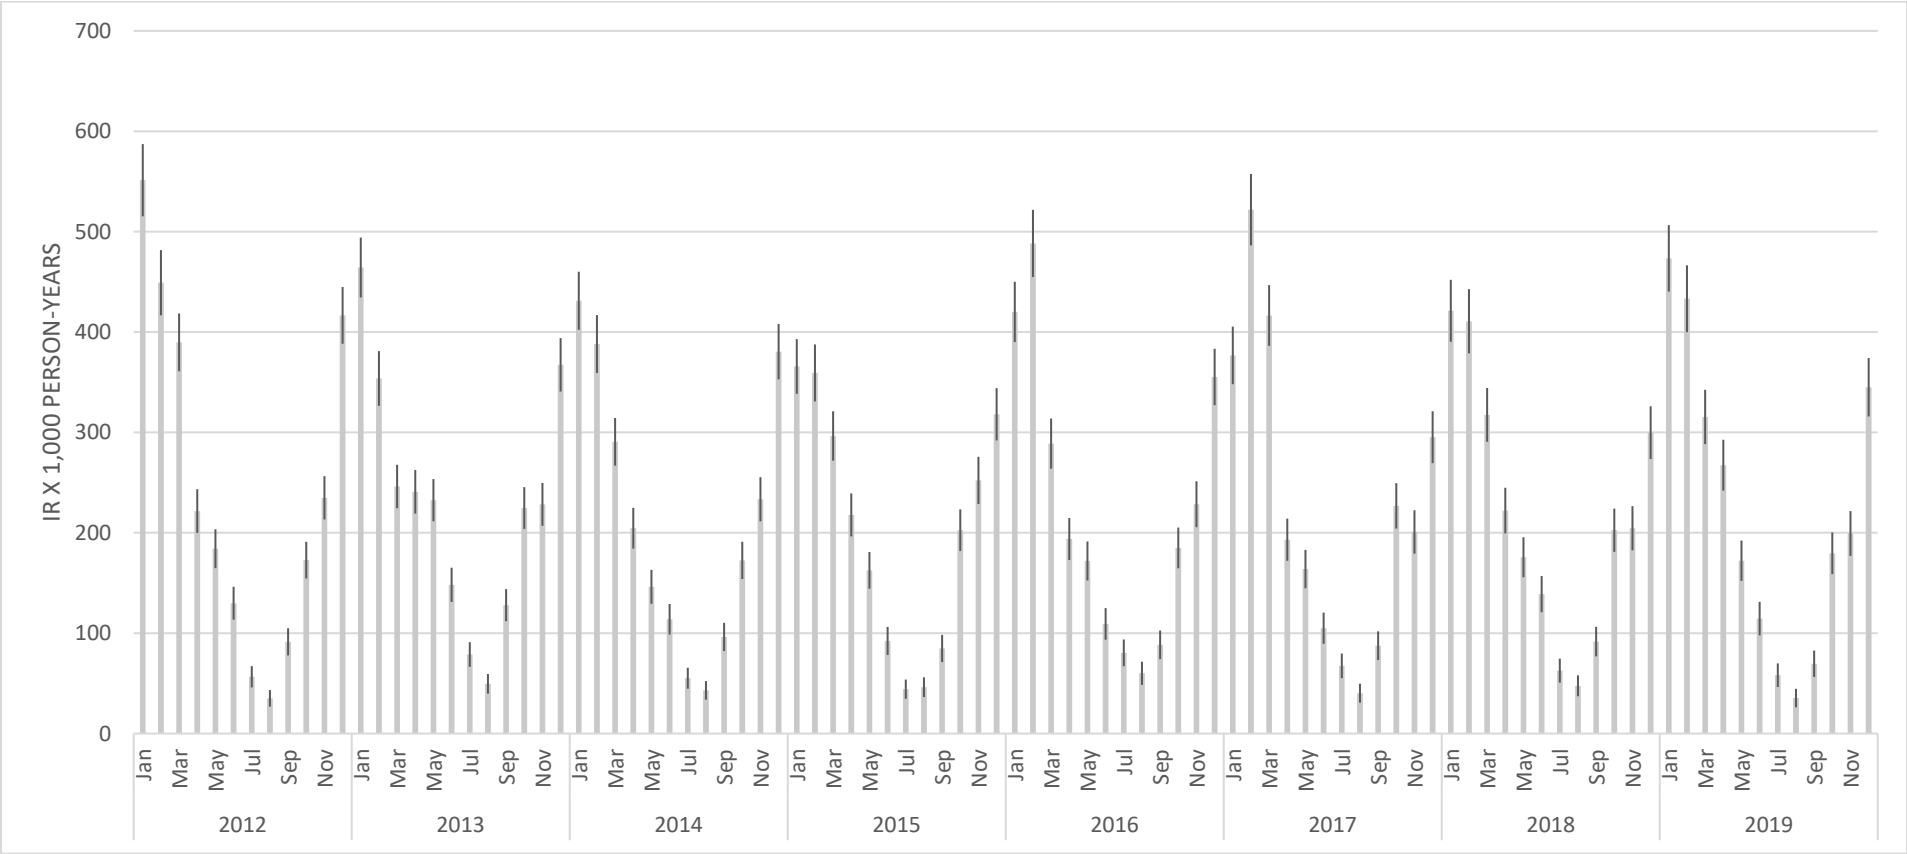

**Figure 5s. LRTI IR in children aged 0-2 years by month of birth of the patients with LRTI and classified as in-season and out-season. Pedianet 2012-2019**

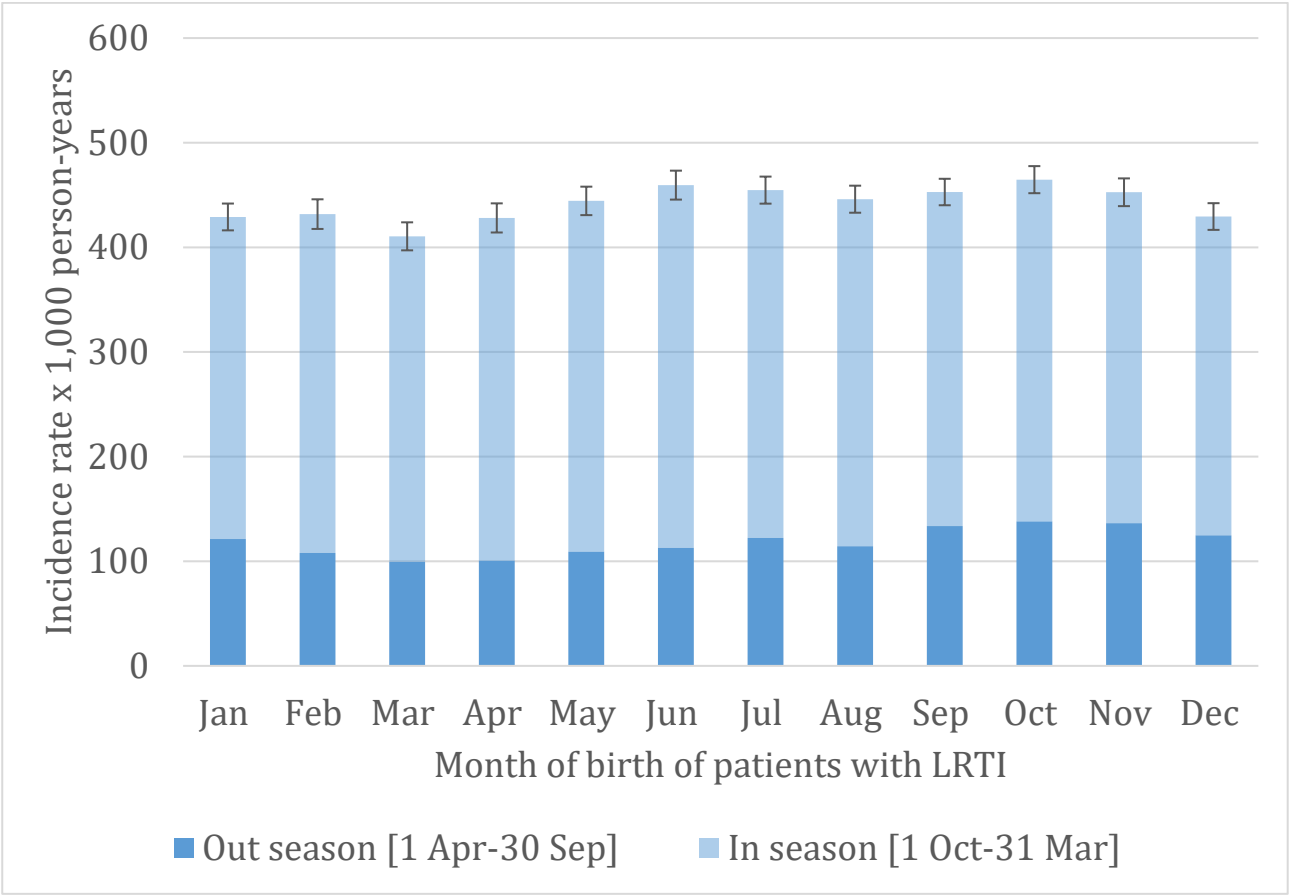

**Figure 6s. LRTI IR in children aged < 12 months overall stratified by season, in-season vs. out-season, calendar month and patient birth month. Pedianet 2012-2019**

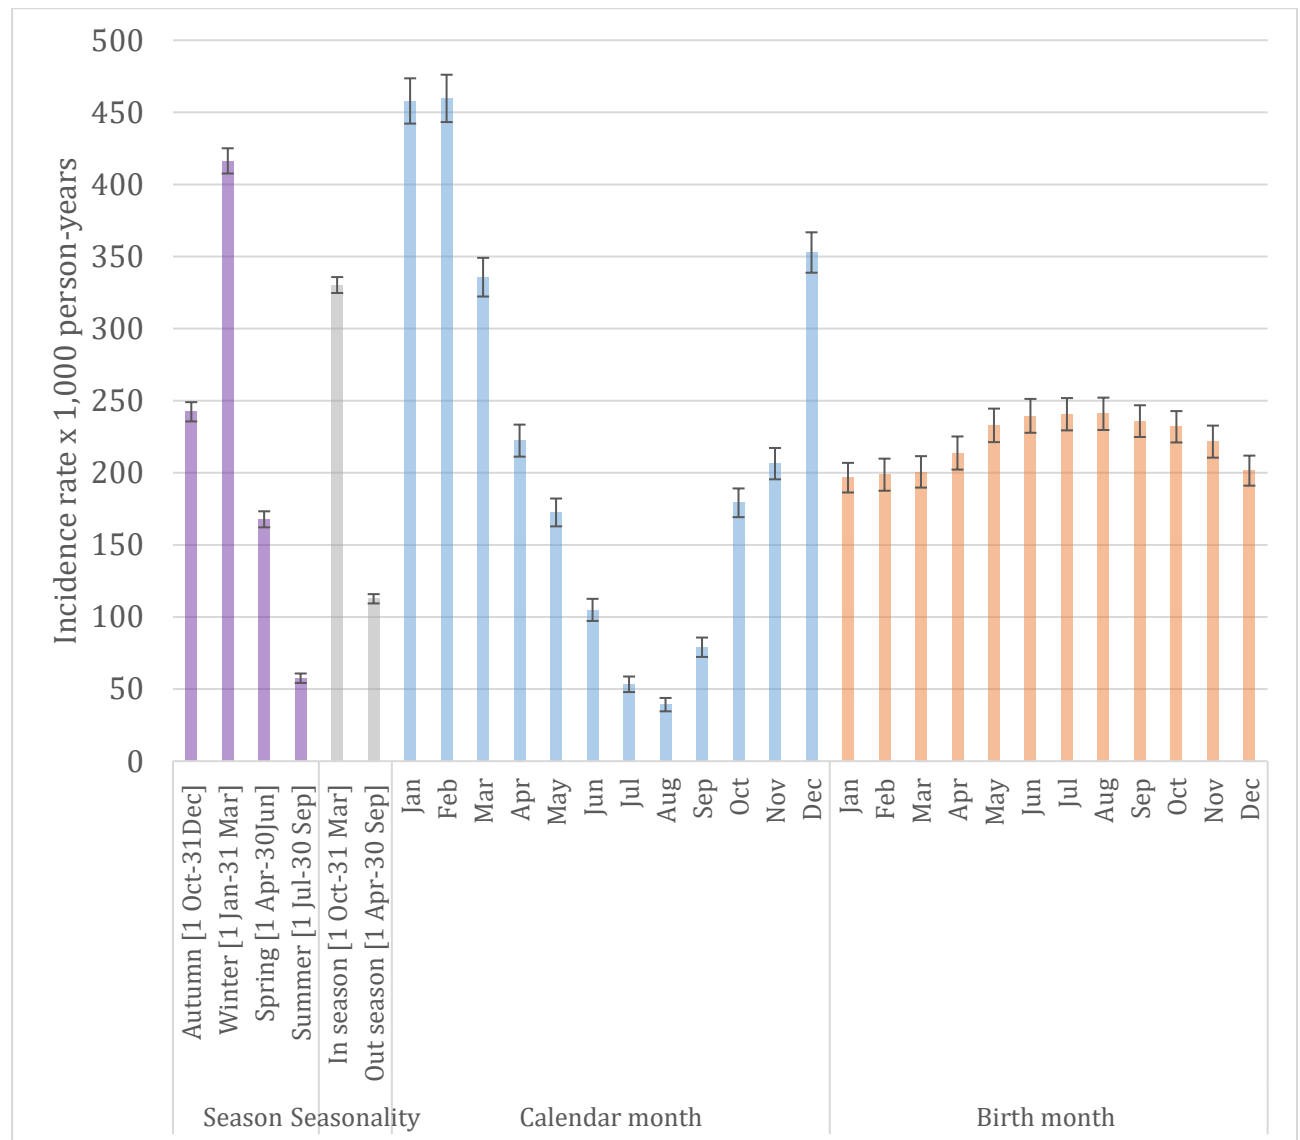

Supplement: Data_Sheet_1.pdf [file Data_Sheet_1.pdf]
